# Supplementary material
Source: PubMed Central journal article supplement (PMC2701469)
Supplement: NIHMS116165-supplement-01.pdf [file NIHMS116165-supplement-01.pdf]

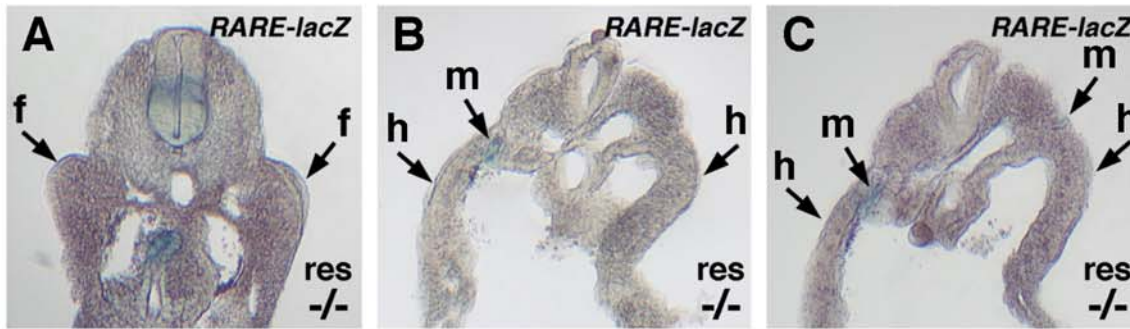

**Figure S1.** Transverse sections of forelimb (f) and hindlimb (h) shown in Figure 2D; m, mesonephros.

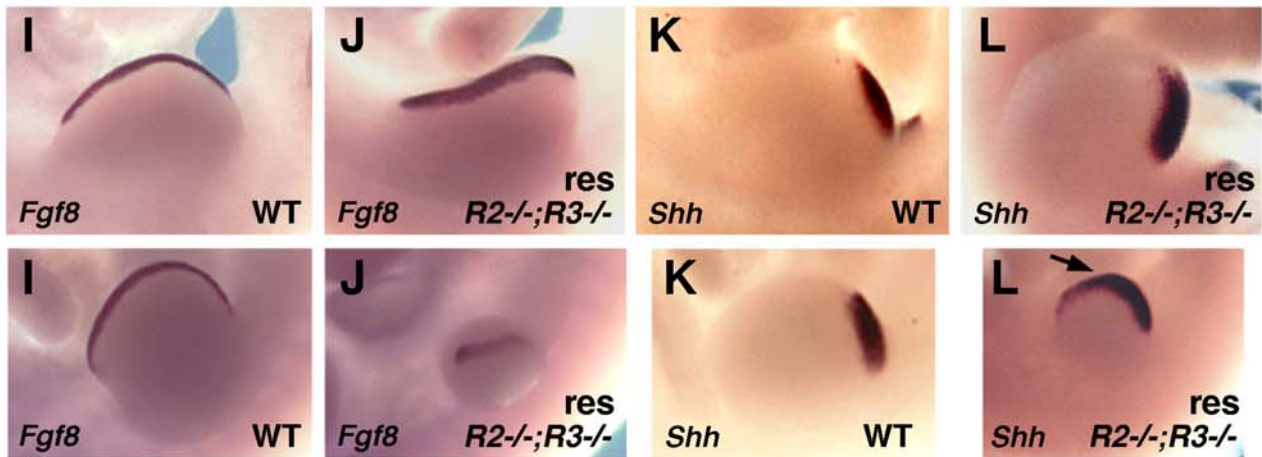

**Figure S2.** Higher magnification of hindlimbs (top) and forelimbs (bottom) in Figure 11-L (anterior to left). Notice abnormal distal *Shh* expression in mutant forelimb (arrow).

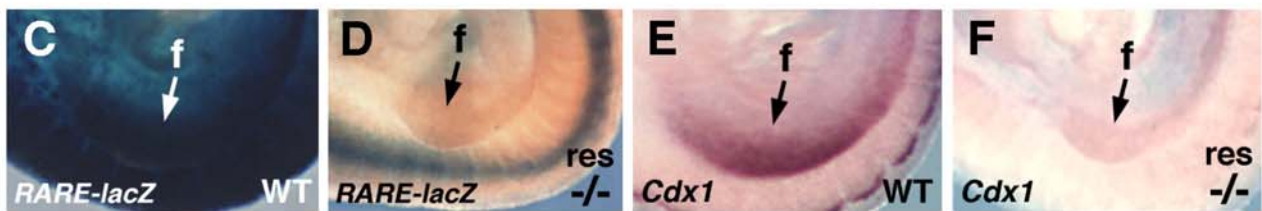

**Figure S3.** Higher magnification of forelimbs in Figure 2C-F (anterior to left).

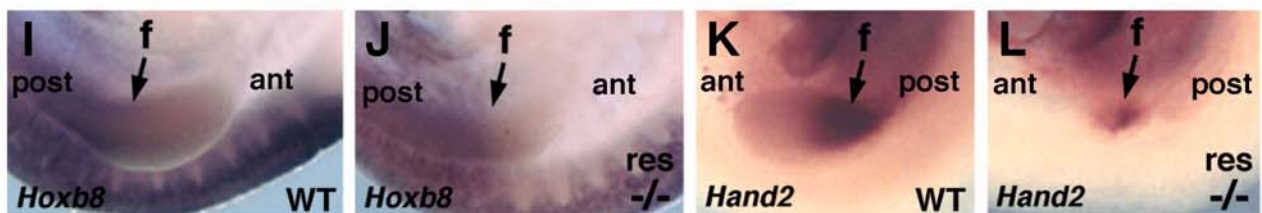

**Figure S4.** Higher magnification of forelimbs in Figure 3I-L.

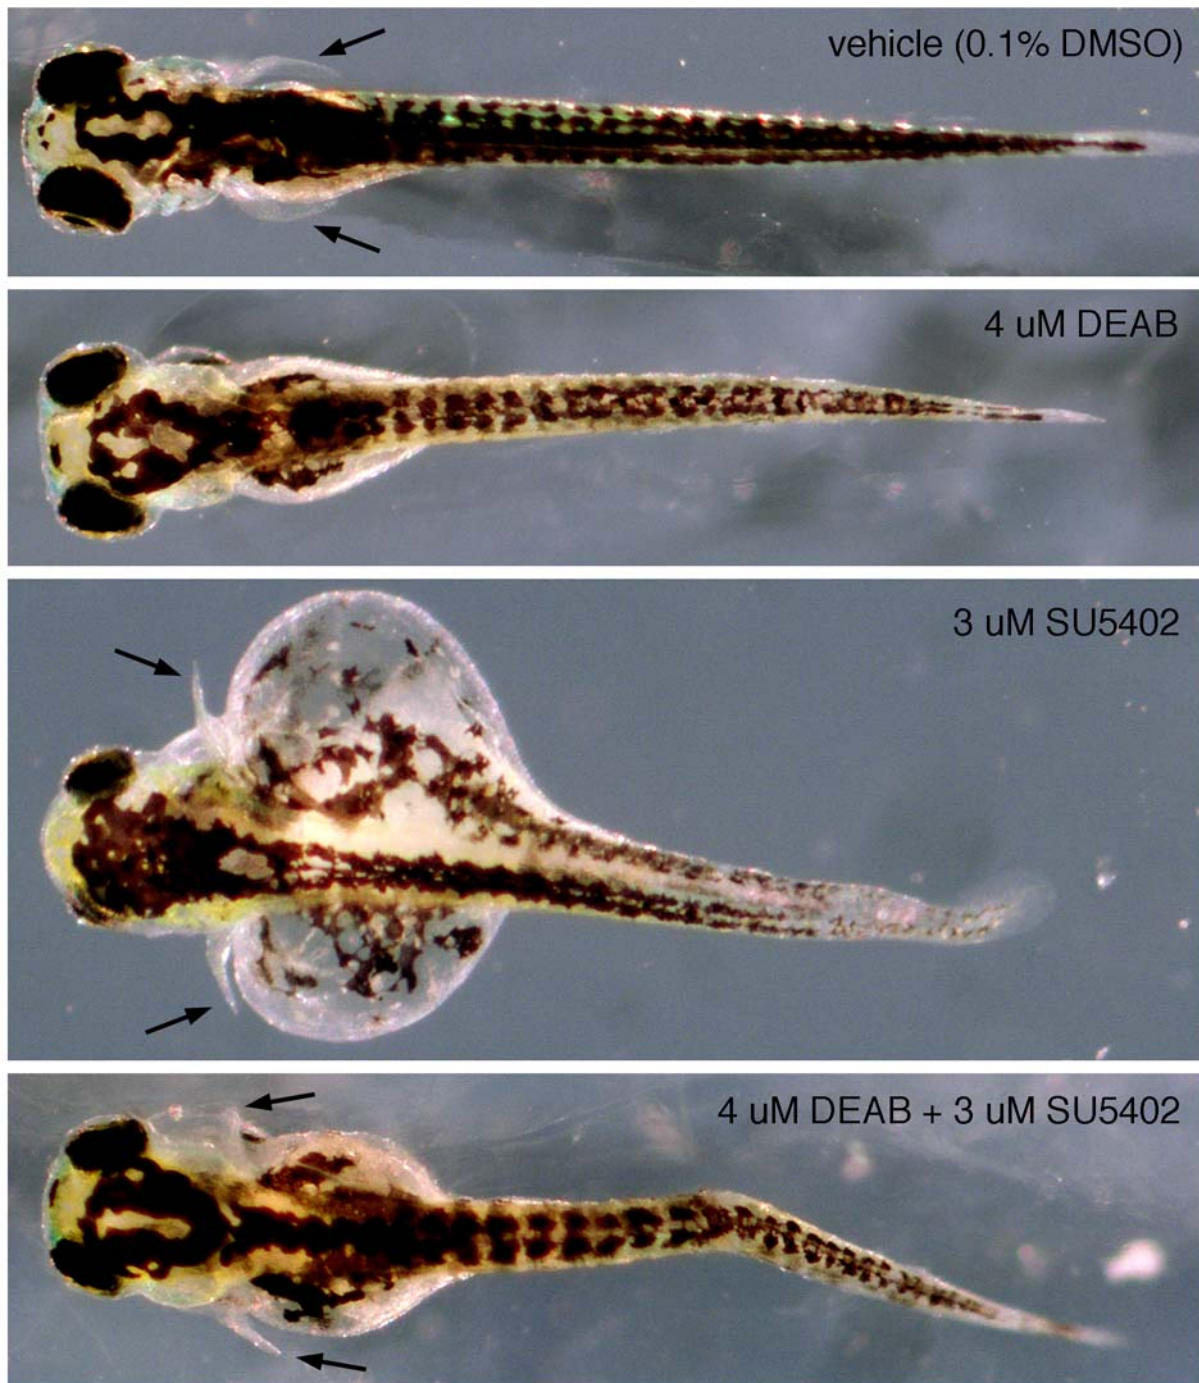

**Figure S5.** Rescue of pectoral fin development in RA-deficient zebrafish embryos. Zebrafish embryos were treated with diethylaminobenzaldehyde (DEAB) to inhibit RA synthesis [15] and/or SU5402 to inhibit FGF receptor signaling [27] from the bud stage (~9.5-10 hours post-fertilization [hpf]) to somite 12-13 (~15 hpf). Control embryos were treated with 0.1% dimethylsulfoxide (DMSO) which served as the vehicle for both drugs. Pectoral fins (indicated by arrows) were observed at 96 hpf. Previous studies demonstrated that 10  $\mu$ M DEAB always eliminated pectoral fins [15]. Preliminary experiments were performed using doses of DEAB ranging from 1-10  $\mu$ M and doses of SU5402 ranging from 3-12  $\mu$ M to find the lowest dose of DEAB that would eliminate pectoral fins and still be tolerable along with SU5402. We found that DEAB in the range of 4-5  $\mu$ M and SU5402 at 3  $\mu$ M allowed embryos to develop to 96 hpf, plus 4-5  $\mu$ M DEAB always eliminated pectoral fins. Treatment with both DEAB and SU5402 often rescued pectoral fin development, with rescued pectoral fins appearing smaller than those present in vehicle-treated embryos (see main text for numbers).



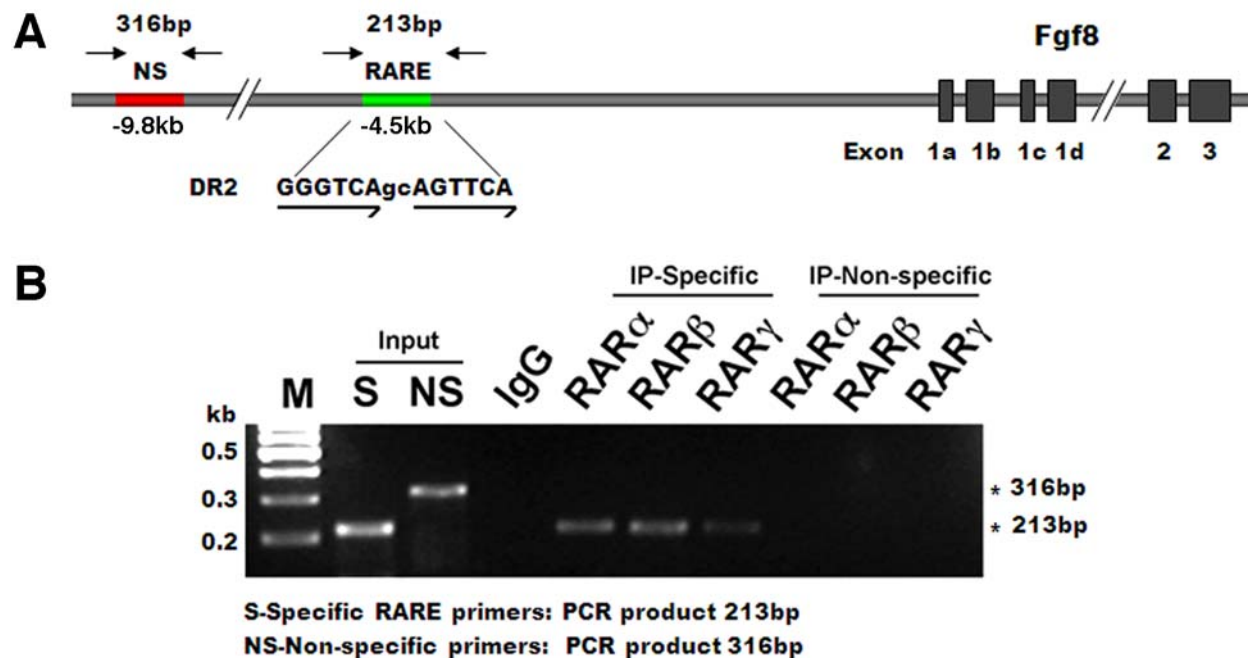

**Figure S6.** Recruitment of retinoic acid receptors to the mouse *Fgf8* promoter *in vivo*. (A) Schematic representation of the mouse *Fgf8* upstream region containing the DR2 retinoic acid response element (RARE). *Fgf8* exons 1, 2 and 3 are represented as solid boxes. Exons 1a, 1b, 1c and 1d are alternatively spliced to generate eight different *Fgf8* isoforms [Guo, Q. and Li, J.Y.H. (2007). Distinct functions of the major *Fgf8* spliceform, *Fgf8b*, before and during mouse gastrulation. *Development* 134, 2251-2260]. For chromatin immunoprecipitation (ChIP) assays, arrows indicate the location of primer pairs used to amplify the RARE-containing region located 4.5 kb upstream of exon 1a and a non-specific negative control region located 9.8 kb upstream. (B) ChIP assay was performed using E8.5 mouse embryos. The cross-linked protein-DNA complexes were immunoprecipitated with anti-RAR- $\alpha$ , RAR- $\beta$  and RAR- $\gamma$  antibodies. Mouse IgG was used as a negative control. Input material and immunoprecipitates were analyzed by PCR with specific primers flanking the RARE and non-specific primers for mouse *Fgf8* promoter. PCR products were separated by 3% agarose gel electrophoresis and visualized using ethidium bromide staining. S: RARE specific primers, NS: Non-specific primers.

Experimental Procedures: Chromatin Immunoprecipitation (ChIP) was performed according to the manufacturer's ChIP protocol (Active Motif, Carlsbad, CA). Ten E8.5 wild-type mouse embryos were cross-linked with 1% formaldehyde at room temperature for 15 min. Isolated nuclei (in 750 $\mu$ l) were sonicated for twelve 10-s pulses on ice (to shear DNA to an average size of 500 bp) and then the sample was microcentrifuged at 13,000 rpm for 10 min. At this point, a small portion of supernatant was stored as input control. For immunoprecipitation, 150 $\mu$ l of sheared chromatin mixed with 3 $\mu$ g of either anti-RAR- $\alpha$  (sc-551, Santa Cruz Biotechnology), anti-RAR- $\beta$  (Affinity Bioreagents), anti-RAR- $\gamma$  antibodies (provided by Lorraine J. Gudas), or control IgG was used in each ChIP reaction mixed with 25  $\mu$ l preblocked protein G-coated magnetic beads (Active Motifs, Carlsbad, CA) for 4 h at 4  $^{\circ}$ C. Beads were washed and eluted DNA-protein complexes were reverse cross-linked and purified. ChIP analysis was performed at least in three independent experiments. RARE specific and non-specific Primer sequences for mouse *Fgf8* used in this study were:

*Fgf8* RARE-F: 5'-CAG CAC TCT GCC ATA CTG TCT TA -3'  
*Fgf8* RARE-R: 5'-TCT GTC AGT CTT CAG CTT GTC TG -3'

*Fgf8* Non-specific-F: 5'-GTC AGT CTG CGA ATA TAG CTC AG -3'  
*Fgf8* Non-specific-R: 5'-CAC AGT ACC AAC AAG TGT CAC AG-3'
